# Supplementary material for: Genome sequencing of the winged midge, Parochlus steinenii, from the Antarctic Peninsula
Source: PubMed Central journal article supplement (PMC5467013; doi:10.1093/gigascience/giw009), 2017-02-24
Supplement: giw009_Reviewer_1_Report_(Revision_1).pdf [file giw009_Reviewer_1_Report_%28Revision_1%29.pdf]

## Reviewer Report

**Title:** "Genome sequencing of the winged midge, *Parochlus steinenii*, from the Antarctic Peninsula"

**Version:** Revision 1      **Date:** 10/24/2016

**Reviewer name:** Monica Poelchau

### Reviewer Comments to Author:

Thank you for addressing almost all of my concerns on the previous version of the manuscripts. My only remaining concern is that there are no plans to deposit the genome assembly in an INSDC repository (GenBank, ENA or DDBJ). Please consider going through this extra step, as it will make your assembly much easier to find for other researchers. I realize that GigaDB can also serve as a repository for the assembly, but the INSDC repositories are really the best place for this assembly to be stored for better retrieval and re-use by the scientific community.

Minor corrections to the manuscript text:

l. 76 (Legend for Table 1). Please remove this sentence: 'Tree-type libraries were constructed in this study.'

l. 207: Change 'from maker annotation' to 'from the MAKER2 annotation'.

### Level of Interest

Please indicate how interesting you found the manuscript: An article whose findings are important to those with closely related research interests

### Quality of Written English

Please indicate the quality of language in the manuscript: Acceptable

### Declaration of Competing Interests

Please complete a declaration of competing interests, considering the following questions:

- Have you in the past five years received reimbursements, fees, funding, or salary from an organisation that may in any way gain or lose financially from the publication of this manuscript, either now or in the future?

- Do you hold any stocks or shares in an organisation that may in any way gain or lose financially from the publication of this manuscript, either now or in the future?
- Do you hold or are you currently applying for any patents relating to the content of the manuscript?
- Have you received reimbursements, fees, funding, or salary from an organization that holds or has applied for patents relating to the content of the manuscript?
- Do you have any other financial competing interests?
- Do you have any non-financial competing interests in relation to this paper?

If you can answer no to all of the above, write 'I declare that I have no competing interests' below. If your reply is yes to any, please give details below.

I declare that I have no competing interests.

I agree to the open peer review policy of the journal. I understand that my name will be included on my report to the authors and, if the manuscript is accepted for publication, my named report including any attachments I upload will be posted on the website along with the authors' responses. I agree for my report to be made available under an Open Access Creative Commons CC-BY license (<http://creativecommons.org/licenses/by/4.0/>). I understand that any comments which I do not wish to be included in my named report can be included as confidential comments to the editors, which will not be published.

I agree to the open peer review policy of the journal
